# Supplementary material for: Impact of Breastfeeding and Cosleeping on Early Childhood Caries: A Cross-Sectional Study
Source: PubMed Central journal article supplement (PMC8067957; doi:10.3390/jcm10081561), 2021-04-08
Supplement: jcm-10-01561-s001.pdf [file jcm-10-01561-s001.pdf]

## Supplementary Materials:

**Table S1.** Questionnaire.

|                                                                           |                           |
|---------------------------------------------------------------------------|---------------------------|
| Did you cosleep?                                                          |                           |
| Yes                                                                       | 112 (53.3%)               |
|                                                                           | How long did you cosleep? |
| 3 months                                                                  | 4 (1.9%)                  |
| 6 months                                                                  | 32 (15.1%)                |
| 10 months                                                                 | 1 (0.5%)                  |
| 12 months                                                                 | 29 (13.7%)                |
| 13 months                                                                 | 1 (0.5%)                  |
| 15 months                                                                 | 1 (0.5%)                  |
| 16 months                                                                 | 1 (0.5%)                  |
| 18 months                                                                 | 19 (9%)                   |
| 24 months                                                                 | 16 (7.5%)                 |
| 36 months                                                                 | 9 (4.2%).                 |
| No                                                                        | 100 (46.7%)               |
| Which type of breastfeeding did you do?                                   |                           |
| Exclusive breastfeeding                                                   | 163 (76.9%)               |
| Mixed breastfeeding                                                       | 49 (23.1%)                |
| How long did you do night-time breastfeeding?                             |                           |
| 3 months                                                                  | 2 (0.9%)                  |
| 5 months                                                                  | 9 (4.2%)                  |
| 6 months                                                                  | 13 (6.1%)                 |
| 9 months                                                                  | 19 (9.0%)                 |
| 12 months                                                                 | 13 (6.1%)                 |
| 13 months                                                                 | 10 (4.7%)                 |
| 14 months                                                                 | 9 (4.2%)                  |
| 15 months                                                                 | 19 (9.0%)                 |
| 16 months                                                                 | 7 (3.3%)                  |
| 17 months                                                                 | 12 (5.7%)                 |
| 18 months                                                                 | 10 (4.7%)                 |
| 19 months                                                                 | 18 (8.5%)                 |
| 20 months                                                                 | 21 (9.9%)                 |
| 21 months                                                                 | 10 (4.7%)                 |
| 22 months                                                                 | 19 (9.0%)                 |
| 24 months                                                                 | 7 (3.3%)                  |
| 25 months                                                                 | 8 (3.8%)                  |
| 30 months                                                                 | 6 (2.8%)                  |
| How many times did the baby feed at an age of 12 months during the night? |                           |
| 0 feedings                                                                | 7 (3.3%)                  |
| 1 feeding                                                                 | 73 (34.4%)                |
| 2 feedings                                                                | 76 (35.8%)                |
| 3 feedings                                                                | 49 (23.1%)                |
| 4 feedings                                                                | 7 (3.3%)                  |
| How many times did the baby feed at an age of 18 months during the night? |                           |
| 0 feedings                                                                | 119 (56.1%)               |
| 1 feeding                                                                 | 36 (17%)                  |

|                                                                                                                                                                                                                           |             |
|---------------------------------------------------------------------------------------------------------------------------------------------------------------------------------------------------------------------------|-------------|
| 2 feedings                                                                                                                                                                                                                | 22 (10.4%)  |
| 3 feedings                                                                                                                                                                                                                | 19 (9%)     |
| 4 feedings                                                                                                                                                                                                                | 7 (3.3%)    |
| 5 feedings                                                                                                                                                                                                                | 7 (3.3%)    |
| 6 feedings                                                                                                                                                                                                                | 2 (0.9%)    |
| <b>Were you conscious most of the time when your child was breastfeeding during the night?</b>                                                                                                                            |             |
| Conscious                                                                                                                                                                                                                 | 122 (57.5%) |
| Sometimes conscious                                                                                                                                                                                                       | 77 (36.3%)  |
| Unconscious                                                                                                                                                                                                               | 13 (6.1%)   |
| <b>Does your child consume sugar on a daily basis, including sweets, jams, marmalades, soft drinks, fruit juices, cakes, and other sweets (such as pastries, honey, and sweetened or flavored yogurts, among others)?</b> |             |
| Rarely or never                                                                                                                                                                                                           | 68 (32.1%)  |
| Once a day                                                                                                                                                                                                                | 83 (39.2%)  |
| Twice a day                                                                                                                                                                                                               | 56 (26.4%)  |
| Three or more times a day                                                                                                                                                                                                 | 5 (2.4%)    |
| <b>When did you start brushing your child's teeth?</b>                                                                                                                                                                    |             |
| From 6 months of age                                                                                                                                                                                                      | 48 (22.6%)  |
| From 12 months of age                                                                                                                                                                                                     | 99 (46.7%)  |
| From 24 months of age                                                                                                                                                                                                     | 56 (26.4%)  |
| From 36 months of age                                                                                                                                                                                                     | 9 (4.2%)    |
| <b>Does your child use fluoride toothpaste?</b>                                                                                                                                                                           |             |
| Yes                                                                                                                                                                                                                       | 159 75%     |
| No                                                                                                                                                                                                                        | 53 25%      |
| <b>When did your child go to the dentist for the first time?</b>                                                                                                                                                          |             |
| At 12 months of age                                                                                                                                                                                                       | 58 (27.4%)  |
| At 24 months of age                                                                                                                                                                                                       | 103 (48.6%) |
| At 36 months of age                                                                                                                                                                                                       | 33 (15.6%)  |
| At 48 months of age                                                                                                                                                                                                       | 18 (8.5%)   |
| <b>Did you perform oral hygiene after each night-time feeding?</b>                                                                                                                                                        |             |
| Yes                                                                                                                                                                                                                       | 63 (29.7%)  |
| No                                                                                                                                                                                                                        | 149 (70.3%) |
